# Supplementary material for: Inhibition of lysophosphatidic acid receptors 1 and 3 attenuates atherosclerosis development in LDL-receptor deficient mice
Source: PubMed Central journal article supplement (PMC5121611; doi:10.1038/srep37585), 2016-11-24
Supplement: srep37585-s1.pdf [file srep37585-s1.pdf]

# Supplementary Information

## **Inhibition of lysophosphatidic acid receptors 1 and 3 attenuates atherosclerosis development in LDL-receptor deficient mice**

Kritikou E., van Puijvelde G.H.M., van der Heijden T., van Santbrink P.J., Swart M., Schaftenaar F.H., Kröner M.J., Kuiper J., Bot I.

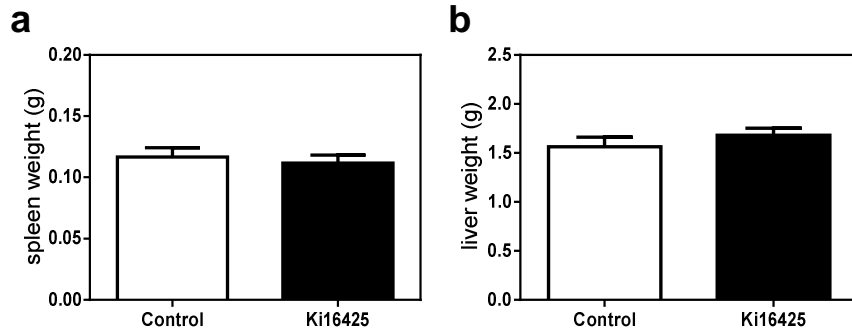

**Figure 1: Treatment with Ki16425 does not affect the spleen or liver weight of mice. (a)** The spleen weight between the control and Ki16425 treated group showed no significant difference ( $P=0.63$ ) at the end of the study. **(b)** Similarly the liver weight between the control and Ki16425 groups was not substantially different ( $P=0.38$ ). All values ( $n=13$ /grp; spleen and  $n=6$ /grp; liver) are depicted as mean $\pm$ SEM.

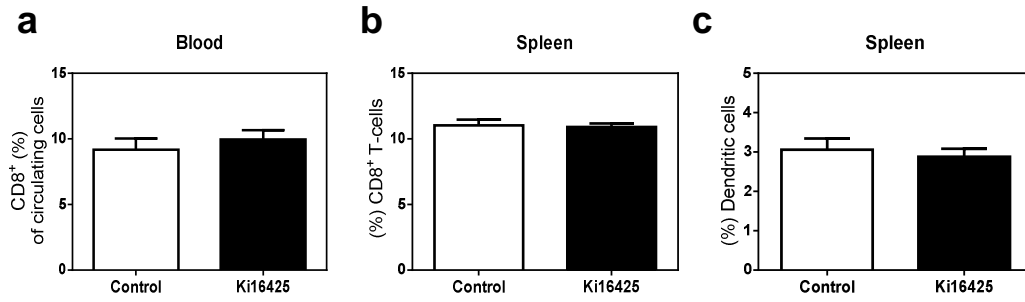

**Figure 2.** LPA<sub>1/3</sub> inhibition did not affect the amount of CD8<sup>+</sup> T-lymphocytes or dendritic cells. The amount of CD8<sup>+</sup> T-cells in the (a) circulation and (b) spleen was not affected by treatment with Ki16425. (P=0.50) and (P=0.78). (c) The overall percentage of dendritic cells present in the spleen showed no differences among the control and treated mice (P=0.60). (All values (n=12/grp) are depicted as mean±SEM).

| <i>Gene</i>    | <i>Forward primer (5'-3')</i> | <i>Reverse primer (3'-5')</i> |
|----------------|-------------------------------|-------------------------------|
| CCL2           | GCATCT GCCCTAAGGTCT TCA       | TTCACTGTCACACTGGTCACTCCTA     |
| CD68           | TGCCTGACAAGGGACACTTCGGG       | GCGGGTGATGCAGAAGGCGATG        |
| CXCL1          | TTGACCCTGAAGCTCCCTTG          | AGGTGCCATCAGAGCAGTC           |
| I-CAM 1        | GTCCGCTTCCGCTACCATCA          | GGTCCTGCCTACTTGCTGCC          |
| Rpl27          | CGCCAAGCGATCCAAGATCAAGTCC     | AGCTGGGTCCCTGAACACATCCTTG     |
| $\beta$ -actin | AACCGTGAAAAGATGACCCAGAT       | CACAGCCTGGATGGCTACGTA         |

**Supplementary Table 1. qPCR gene primer sequences:** All gene expression analysis was performed using two housekeeping genes ( $\beta$ -actin and Rpl27). Abbreviations: Chemokine C-C motif ligand 2 (CCL2); cluster of differentiation 68 (CD68); chemokine C-X-C motif ligand 1 (CXCL1); Intercellular adhesion molecule-1 (ICAM-1); 60s ribosomal protein ligand 27 (Rpl27).

| <b>Antibody</b> | <b>Fluorochrome</b>     | <b>Clone</b>    | <b>Company</b> |
|-----------------|-------------------------|-----------------|----------------|
| CD11b           | eFluor 450              | M1/70           | Ebioscience    |
| Ly6C            | PercP Cy5.5             | HK1.4           | Ebioscience    |
| Ly6G            | PE                      | 1A8             | BD Biosciences |
| CCR2            | APC                     | #475301         | R&D Systems    |
| CD4             | PercP                   | Rm4-5           | BD Biosciences |
| CD25            | FITC                    | PC61.5          | Ebioscience    |
| NK1.1           | FITC                    | PK136           | Ebioscience    |
| CD8a            | PercP                   | 53-6.7          | BD Biosciences |
| MHC-II          | eFluor 450              | AF6-120.1       | Ebioscience    |
| CD11c           | APC                     | N418            | Ebioscience    |
| <i>FoxP3</i>    | <i>eFluor 450</i>       | <i>FJK-16s</i>  | Ebioscience    |
| <i>T-bet</i>    | <i>Alexa -Fluor 660</i> | <i>eBio4B10</i> | Ebioscience    |
| <i>Helios</i>   | <i>Alexa-Fluor 647</i>  | <i>22F6</i>     | Ebioscience    |

**Supplementary Table 2.** List of extracellular and *intracellular* antibodies used.
